# Supplementary material for: Effectiveness of emission control in reducing PM 2.5 pollution in central China during winter haze episodes under various potential synoptic controls
Source: Copernicus journal article supplement (doi:10.5194/acp-21-3143-2021), 2021-03-02
Supplement: Supplementary file 1 [file acp-21-3143-2021-supplement.pdf]

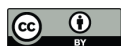

*Supplement of*

**Effectiveness of emission control in reducing PM<sub>2.5</sub> pollution in central China during winter haze episodes under various potential synoptic controls**

**Yingying Yan et al.**

*Correspondence to:* Shaofei Kong (kongshaofei@cug.edu.cn)

The copyright of individual parts of the supplement might differ from the CC BY 4.0 License.



## **S1. Emissions in GEOS-Chem global model and nested model over China**

Table S1 and Table S2 show a list of emission inventories in the global model and nested model over China, respectively. Global anthropogenic emissions of CO, NO<sub>x</sub> and SO<sub>2</sub> in 2013-2014 are from EDGAR (Emission Database for Global Atmospheric Research) v4.2 with a resolution of 0.1° × 0.1°. Monthly global anthropogenic emission of non-methane volatile organic compounds (NMVOCs) are taken from RETRO (REanalysis of the TROpospheric chemical composition) in the year of 2000 with the grid resolution of 0.5° × 0.5°. The monthly emission data of biomass burning comes from GFED4 (Global Fire Emissions Database version 4). Other natural source emissions, such as NO<sub>x</sub> from lightning and soil and NMVOCs from biogenic emissions, are calculated on-line by parameterization based on meteorological conditions in the simulations. The parameterization of soil NO<sub>x</sub> emission follows Hudman et al. (2012). The NMVOCs biogenic emissions are calculated by MEGAN (Model of Emissions of Gases and Aerosols from Nature) v2.1 according to the monthly averaged MODIS (MODerate resolution Imaging Spectroradiometer) leaf area index.

## **S2. Optimization in GEOS-Chem model**

### **(1) Optimize PM<sub>2.5</sub> emissions**

The primary particulate matter emitted by human activities is an important source of PM<sub>2.5</sub> (Pui et al., 2014). Only natural emission sources of PM<sub>2.5</sub>, such as dust and sea salt, are considered in the standard version of GEOS-Chem v11-01 (Yan et al., 2019). According to the emission inventory of MEIC in 2013-2014 and SEEA, this study adds the PM<sub>2.5</sub> primary anthropogenic emissions in the model.

### **(2) Increase the proportion of sulfate primary emission**

Human activities would lead to the primary emission of sulfate (Fu et al., 2013). At present, there is no global/regional sulfate emission inventory, so the model can not grasp the primary emission of sulfate very well. According to previous observations,



the primary emission concentration of sulfate is about 3% of  $\text{SO}_2$  emission concentration (Fu et al., 2013). Thus the primary emission of sulfate in the model is simply parameterized to 3% of  $\text{SO}_2$  emission. However, the latest observation shows that the primary emission of sulfate in China is relatively high (Yan et al., 2020). In addition, the primary emission of  $\text{SO}_3$  and its conversion to sulfate are not considered in the model, so we increase the primary emission proportion of sulfate to 4.5% of  $\text{SO}_2$  emission.



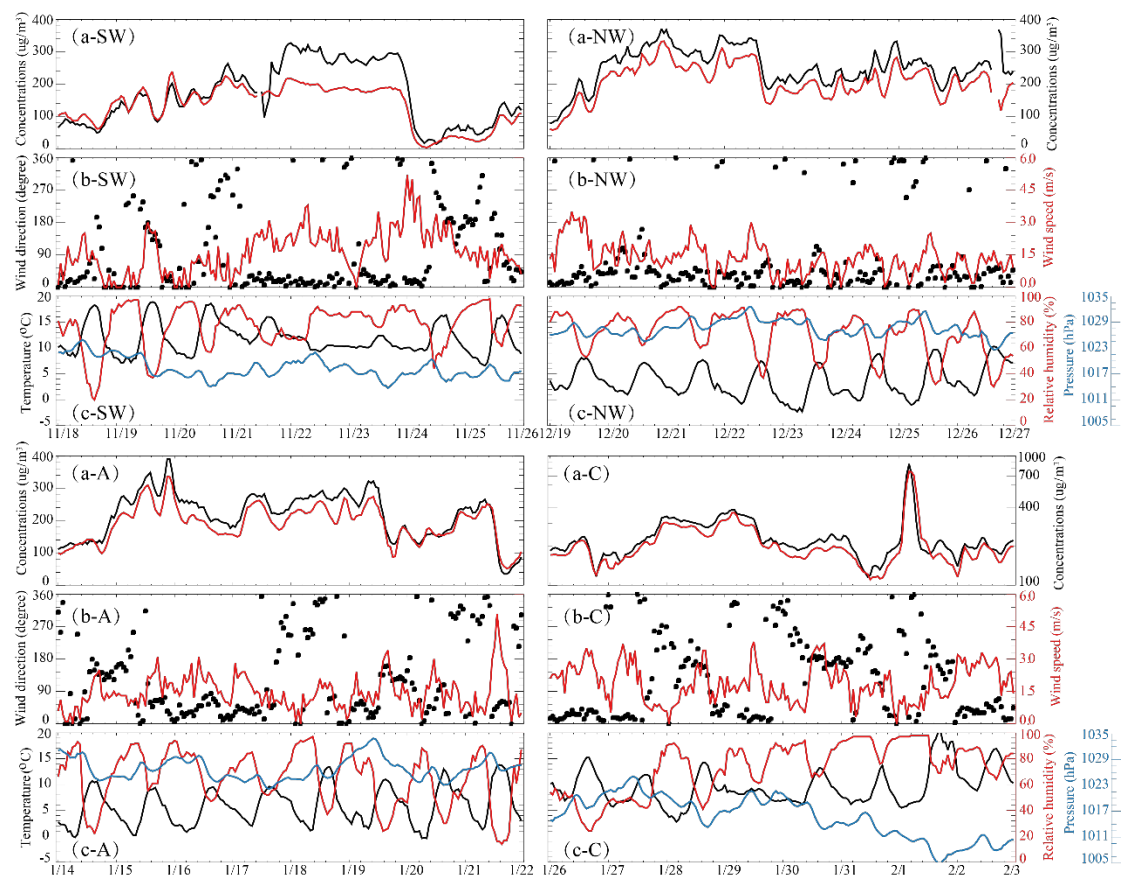

Figure S1 (a) Modeled (red lines) and observed (black lines) hourly  $\text{PM}_{2.5}$  concentration ( $\mu\text{g}/\text{m}^3$ ) at Jingzhou during the four typical heavy pollution processes, forced by SW-type, NW-type, A-type and C-type circulation, respectively. (b) Observed wind speed (red line) and wind direction (black dots). (c) Observed temperature (black line), relative humidity (red line) and sea level pressure (blue line).



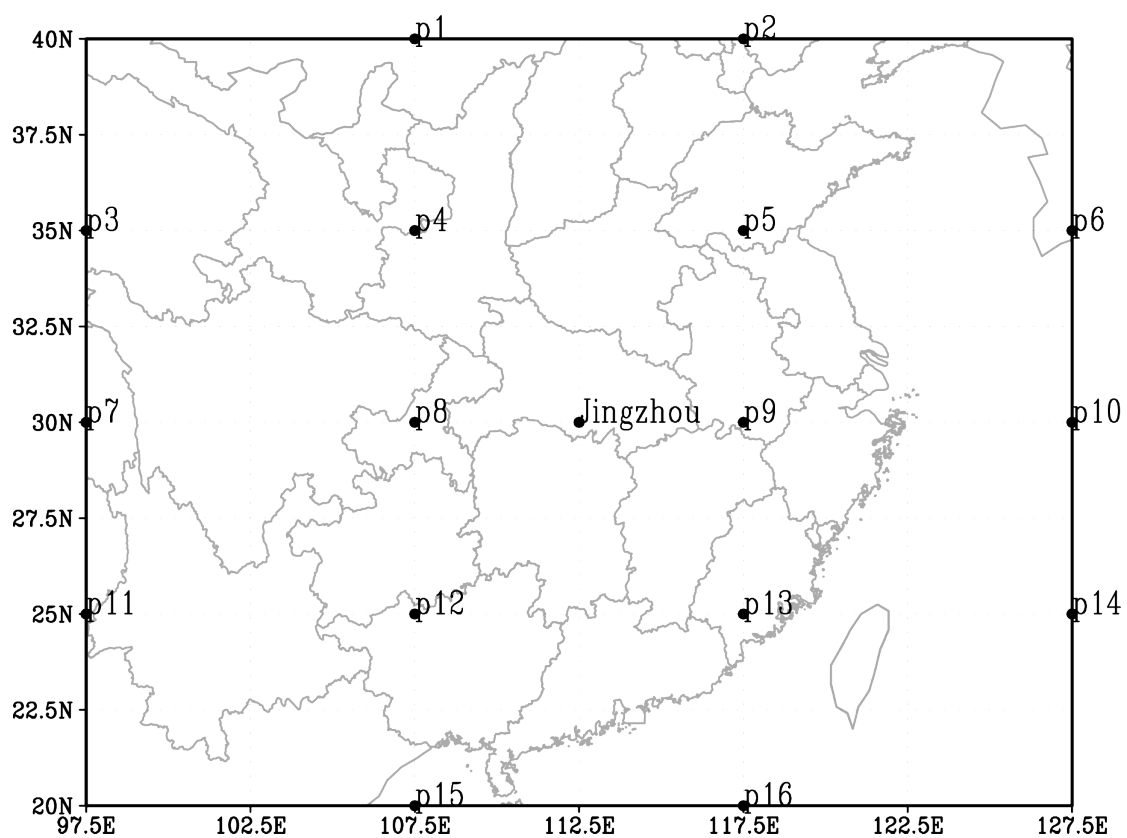

Figure S2 Location of the grid points used in circulation classification calculation



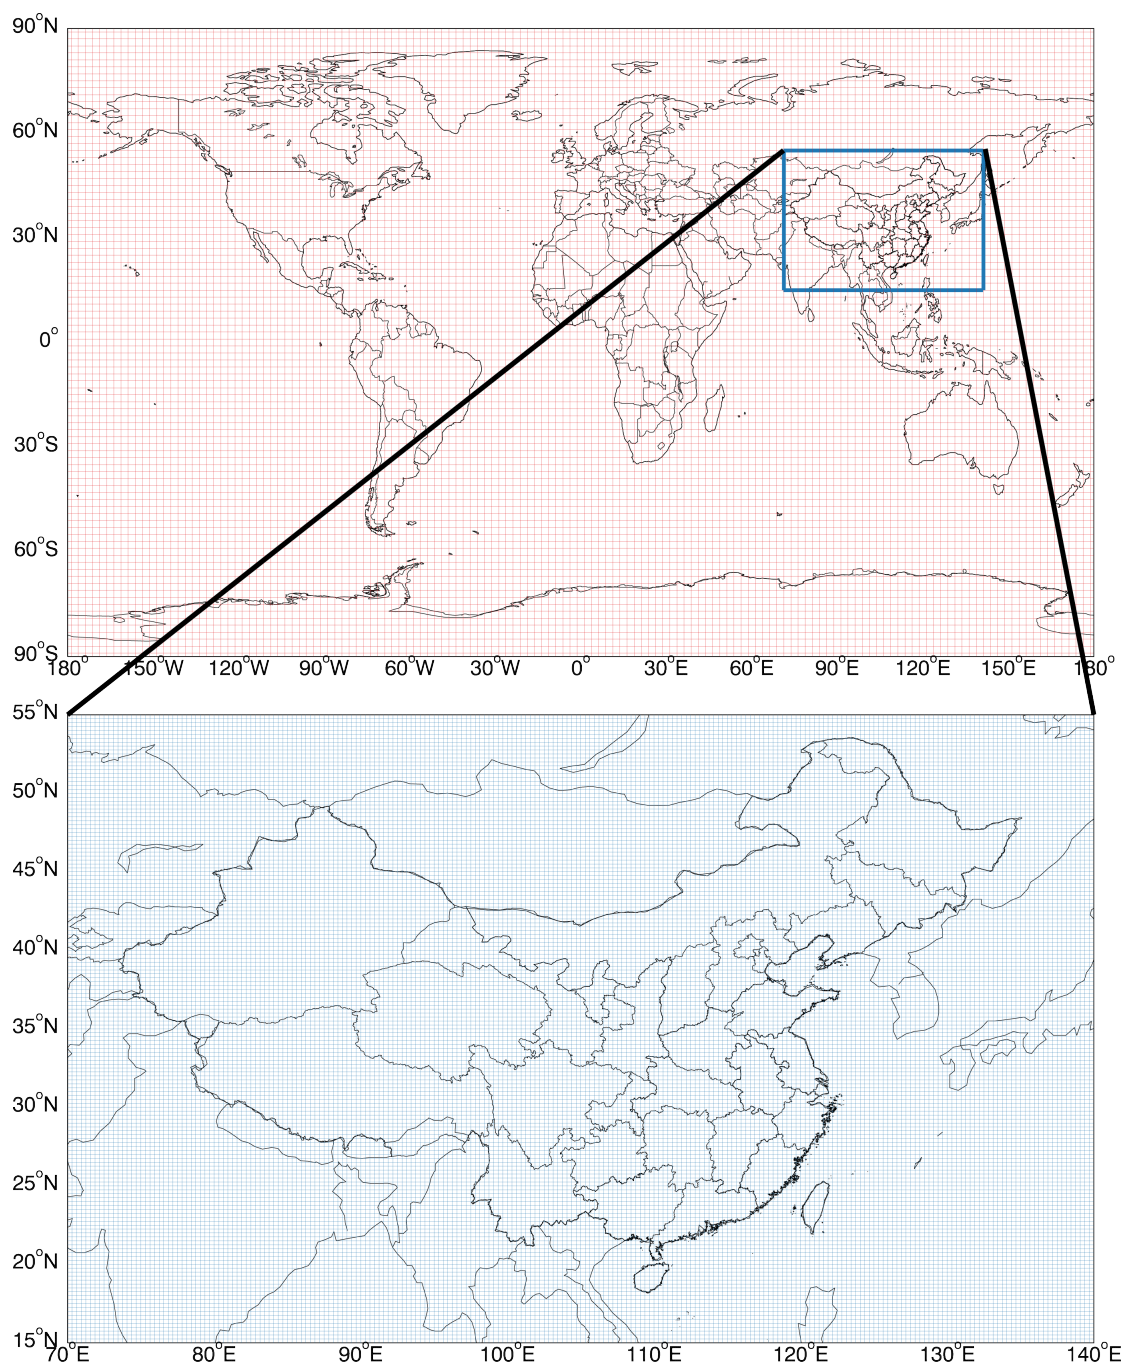

Figure S3 The geographic coverage of each domain and the corresponding resolution for GEOS\_Chem global model ( $2^\circ \times 2.5^\circ$ ) and nested model ( $70^\circ\text{E}$ - $140^\circ\text{E}$ ,  $15^\circ\text{S}$ - $55^\circ\text{N}$ ;  $0.25^\circ \times 0.3125^\circ$ ).



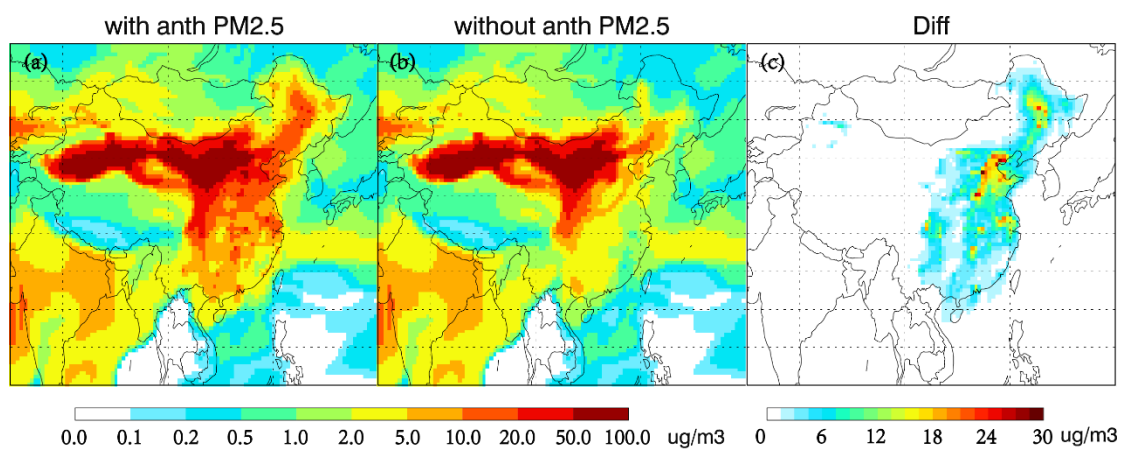

Figure S4 Modeled PM<sub>2.5</sub> concentrations with and without PM<sub>2.5</sub> primary anthropogenic emissions. Also shown is the difference between the two simulations.



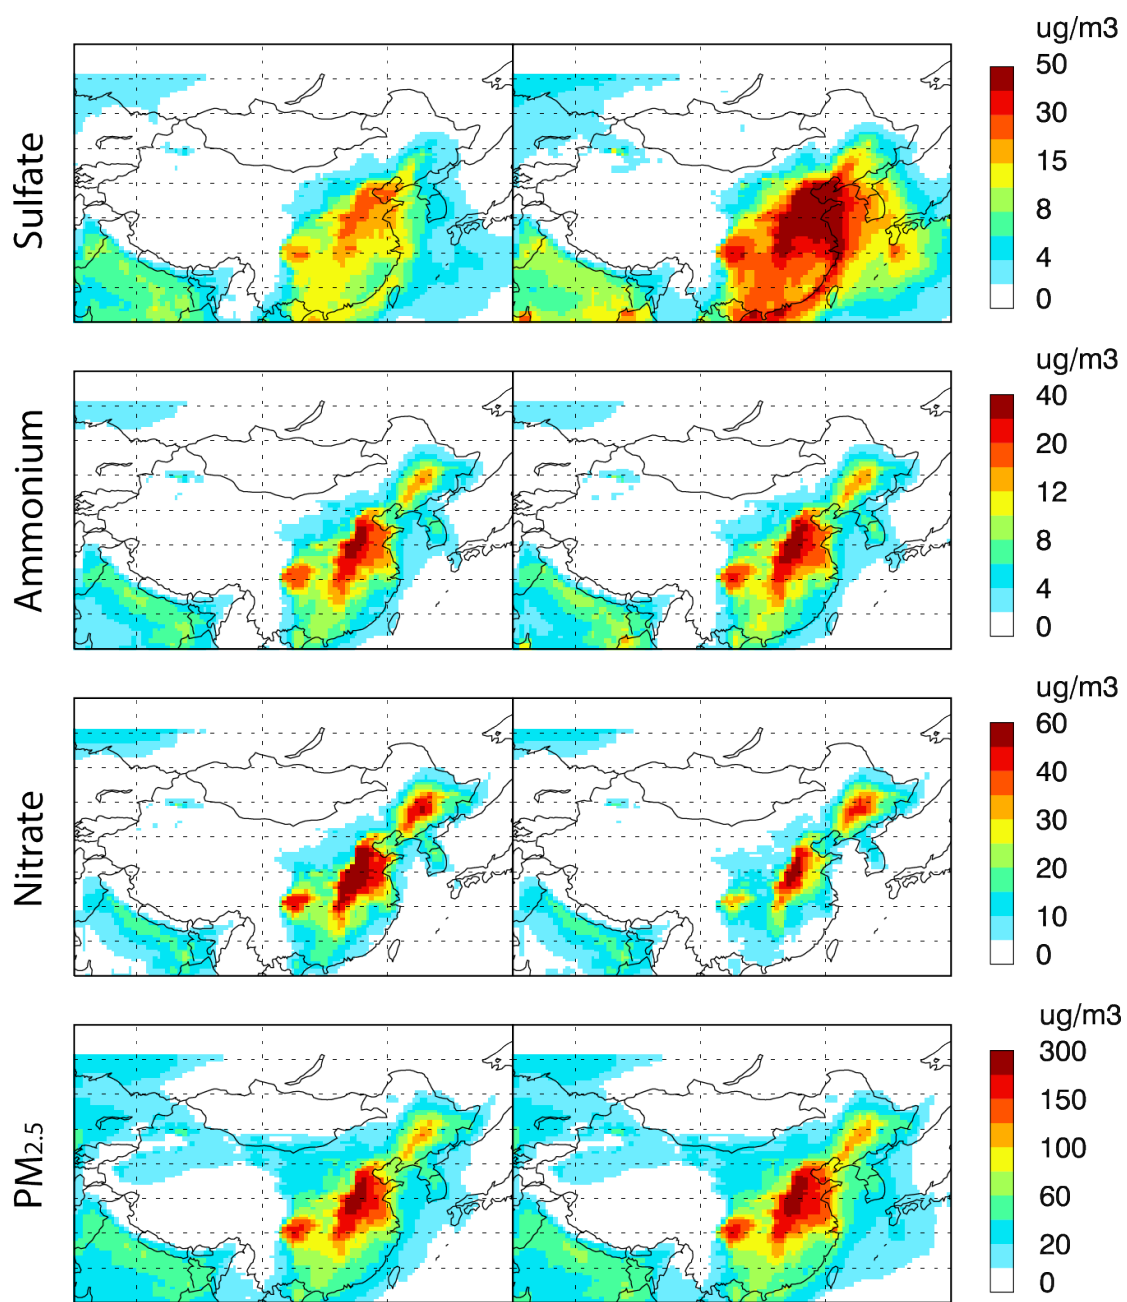

Figure S5 Modeled PM<sub>2.5</sub>, sulfate, nitrate and ammonium concentrations in standard GEOS-Chem v11-01 (left column) and in optimized model version (right column).



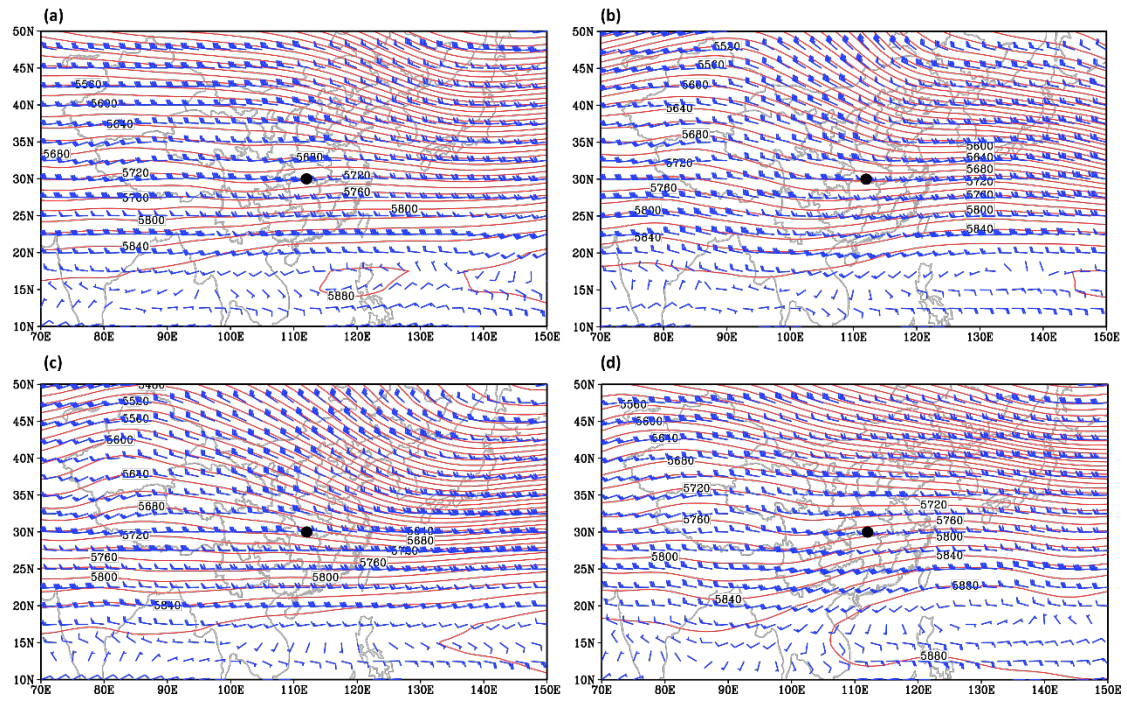

Figure S6 Spatial distribution of 500 hPa geopotential height and wind vector for SW-type (a), NW-type (b), A-type (c) and C-type (d) synoptic control averaged over 2013-2018.



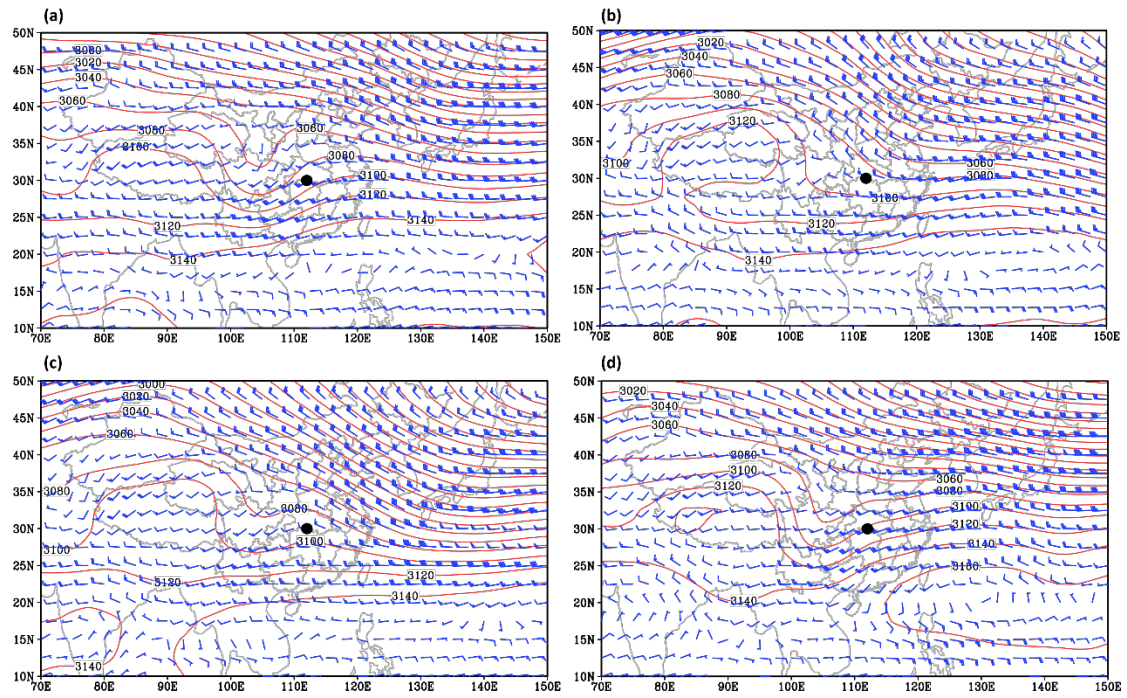

Figure S7 Spatial distribution of 700 hPa geopotential height and wind vector for SW-type (a), NW-type (b), A-type (c) and C-type (d) synoptic control averaged over 2013-2018.



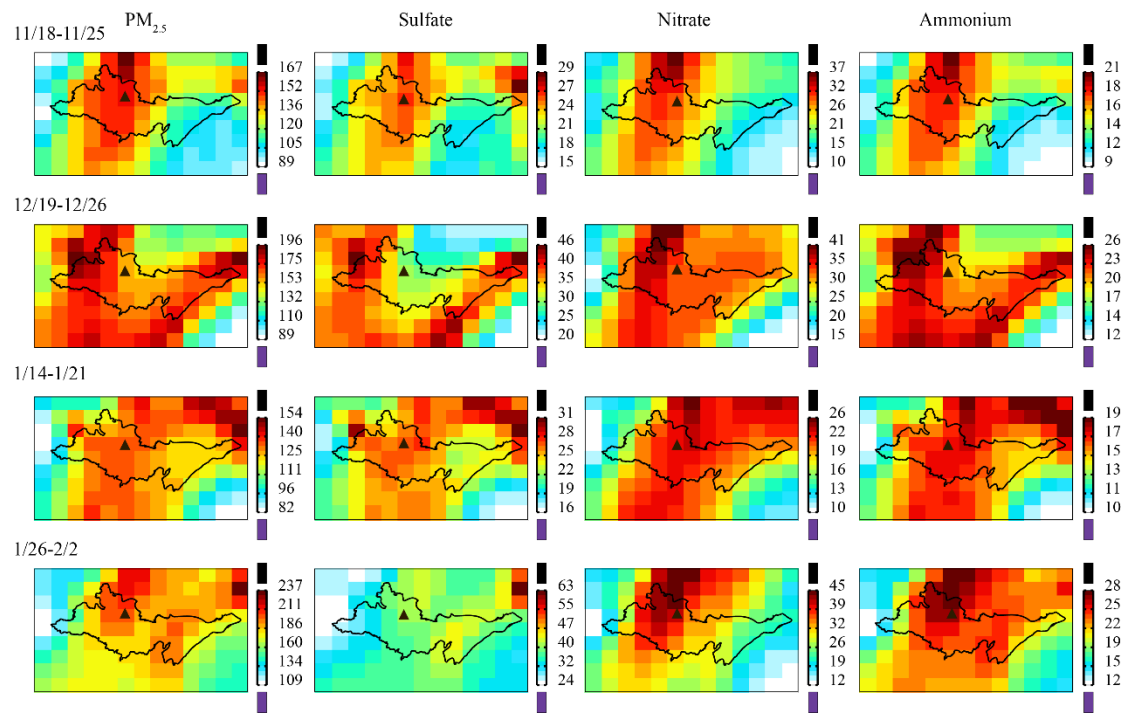

Figure S8 Spatial distribution of  $PM_{2.5}$ , sulfate, nitrate and ammonium concentrations averaged in four typical heavy pollution processes over Jingzhou simulated by GEOS-Chem control simulation ( $\mu g/m^3$ ).



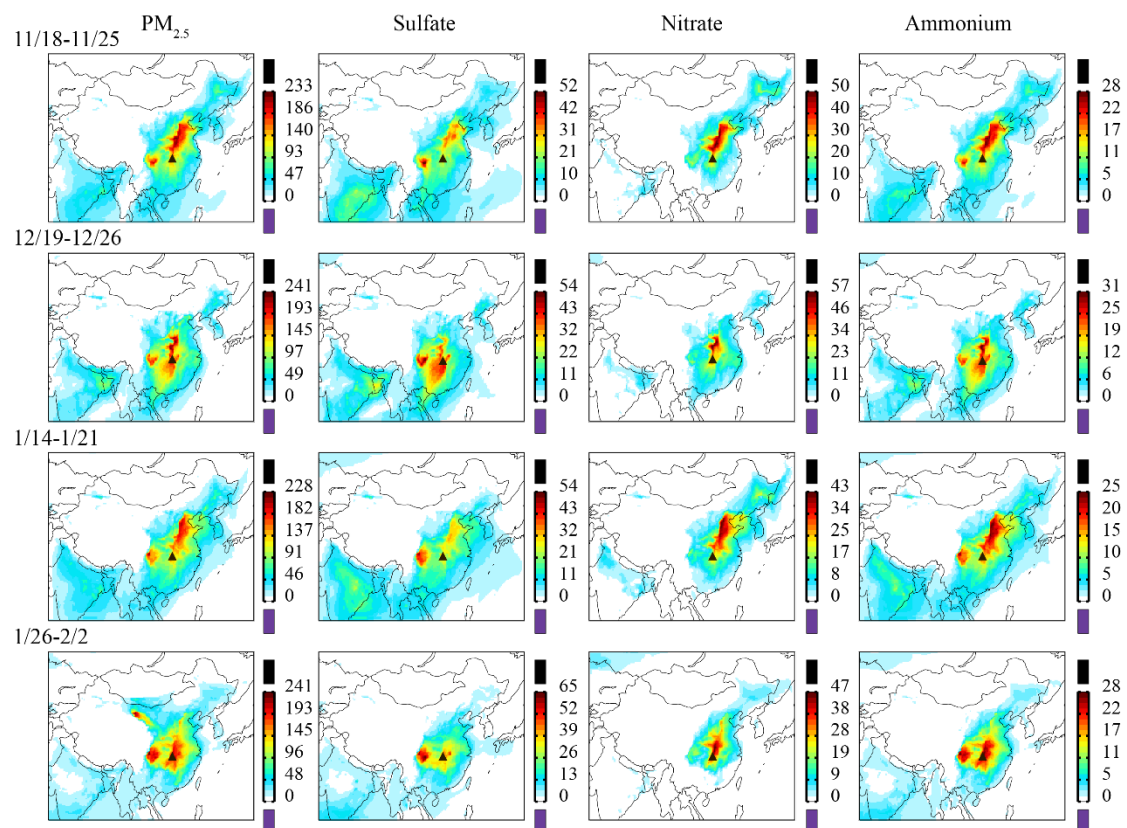

Figure S9 Spatial distribution of PM<sub>2.5</sub>, sulfate, nitrate and ammonium concentrations averaged in four typical heavy pollution processes over China simulated by GEOS-Chem control simulation ( $\mu\text{g}/\text{m}^3$ ).



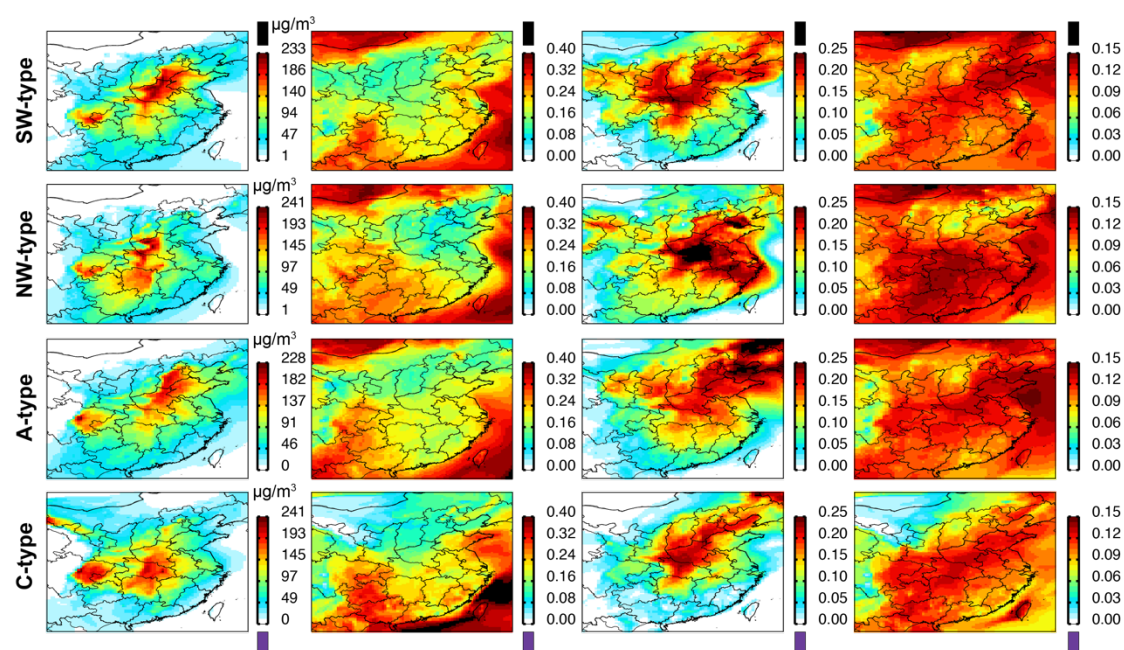

Figure S10 Spatial distribution of  $PM_{2.5}$  concentrations and the fraction of each inorganic salt (sulfate: second column; nitrate: third column; ammonium: forth column) to  $PM_{2.5}$  for these four typical heavy pollution processes simulated by GEOS-Chem control simulation.



Table S1 Anthropogenic and natural source emission inventories adopted in the GEOS-Chem global modelling of this study

| Region                           | Abbreviation | Description                                    | Resolution           | Year      | Species                                                                                    | Reference                                                                                                                                                     |
|----------------------------------|--------------|------------------------------------------------|----------------------|-----------|--------------------------------------------------------------------------------------------|---------------------------------------------------------------------------------------------------------------------------------------------------------------|
| Anthropogenic emission inventory |              |                                                |                      |           |                                                                                            |                                                                                                                                                               |
| Global                           | EDGAR        | EDGAR v4.2 anthropogenic + biofuel             | 0.1°× 0.1°, monthly  | 2013-2014 | NO <sub>x</sub> , SO <sub>2</sub> , SO <sub>4</sub> <sup>2-</sup> , CO, NH <sub>3</sub>    | <a href="http://edgar.jrc.ec.europa.eu/overview.php?v=42">http://edgar.jrc.ec.europa.eu/overview.php?v=42</a>                                                 |
| Global                           | BOND         | BOND biofuel + anthropogenic BC + OC emissions | 1°×1°, monthly       | 2000      | BC and OC                                                                                  | Bond et al. (2007)                                                                                                                                            |
| Global                           | RETRO        | RETRO anthropogenic + biofuel                  | 0.5°×0.5°, monthly   | 2000      | NMVOCs <sup>1</sup> except C <sub>2</sub> H <sub>6</sub> and C <sub>3</sub> H <sub>8</sub> | <a href="ftp://ftp.retro.enes.org/pub/emissions/agggregated/anthro/0.5x0.5/2000/">ftp://ftp.retro.enes.org/pub/emissions/agggregated/anthro/0.5x0.5/2000/</a> |
| Global                           | SHIP         | ICOADS ship emissions                          | 1°×1°, monthly       | 2002      | NO <sub>x</sub> , SO <sub>2</sub> , CO                                                     | Wang et al. (2008)                                                                                                                                            |
| Global                           | AEIC         | Aircraft emissions                             | 1°×1°, monthly       | 2005      | NO <sub>x</sub> , SO <sub>2</sub> , CO, NMVOCs <sup>1</sup> , BC, OC                       |                                                                                                                                                               |
| China                            | MEIC         | MEIC inventory for China                       | 0.25°×0.25°, monthly | 2013-2014 | NO <sub>x</sub> , SO <sub>2</sub> , CO, NMVOCs <sup>1</sup> , NH <sub>3</sub>              | <a href="http://www.meicmodel.org/">http://www.meicmodel.org/</a>                                                                                             |
| USA                              | NEI2011      | US EPA NEI-2011 emission inventory             | 0.1°× 0.1°, monthly  | 2013-2014 | NO <sub>x</sub> , SO <sub>2</sub> , CO, NMVOCs <sup>1</sup> , NH <sub>3</sub> , BC, OC     | <a href="https://www.epa.gov/air-emissions-inventories">https://www.epa.gov/air-emissions-inventories</a>                                                     |
| Europe                           | EMEP         | EMEP                                           | 1°×1°, annual        | 2013-2014 | NO <sub>x</sub> , SO <sub>2</sub> , CO                                                     | Auvray and Bey (2005)                                                                                                                                         |



|                                    |          |                                                           |                       |           |                                                                                                                                              |                                                     |  |  |  |
|------------------------------------|----------|-----------------------------------------------------------|-----------------------|-----------|----------------------------------------------------------------------------------------------------------------------------------------------|-----------------------------------------------------|--|--|--|
| Biomass burning emission inventory |          |                                                           |                       |           |                                                                                                                                              |                                                     |  |  |  |
| Global                             | GFED4    | GFED4 biomass burning inventory                           | 0.25°× 0.25°, monthly | 2013-2014 | NO <sub>x</sub> , SO <sub>2</sub> , CO, NMVOCs, NH <sub>3</sub> , BC, OC                                                                     | http://www.globalfiredata.org, Giglio et al. (2013) |  |  |  |
| Biogenic emission inventory        |          |                                                           |                       |           |                                                                                                                                              |                                                     |  |  |  |
| Global                             | MEGAN    | MEGAN v2.1 biogenic emissions                             | —                     | 2013-2014 | ISOP, monoterpenes, sesquiterpenes, MOH, ACET, ETOH, CH <sub>2</sub> O, ALD <sub>2</sub> , HCOOH, C <sub>2</sub> H <sub>4</sub> , TOLU, PRPE | Guenther et al. (2012)                              |  |  |  |
| Other natural emission inventory   |          |                                                           |                       |           |                                                                                                                                              |                                                     |  |  |  |
| Global                             | SoilNOx  | Emission of NO <sub>x</sub> from soils and fertiliser use | —                     | 2013-2014 | NO                                                                                                                                           | Hudman et al. (2012)                                |  |  |  |
| Global                             | LightNOx | NO <sub>x</sub> from lightning                            | —                     | 2013-2014 | NO                                                                                                                                           | Murray et al. (2012)                                |  |  |  |

1. RETRO includes PRPE, ALK<sub>4</sub>, ALD<sub>2</sub>, CH<sub>2</sub>O and MEK; in the CTM, MEK emissions are further allocated to MEK (25 %) and ACET (75 %). AEIC and MEIC include PRPE, C<sub>2</sub>H<sub>6</sub>, C<sub>3</sub>H<sub>8</sub>, ALK<sub>4</sub>, ALD<sub>2</sub>, CH<sub>2</sub>O, MEK and ACET. NEI2011 includes PRPE, C<sub>3</sub>H<sub>8</sub>, ALK<sub>4</sub>, CH<sub>2</sub>O, MEK and ACET. EMEP includes PRPE, ALK<sub>4</sub>, ALD<sub>2</sub> and MEK. Emissions of C<sub>2</sub>H<sub>6</sub> outside Asia are from Xiao et al. (2008).



Table S2 Anthropogenic and natural source emission inventories adopted in the GEOS-Chem nested modelling of this study

| Region                           | Abbreviation | Description                                    | Resolution           | Year      | Species                                                                                    | Reference                                                                                                                                                     |
|----------------------------------|--------------|------------------------------------------------|----------------------|-----------|--------------------------------------------------------------------------------------------|---------------------------------------------------------------------------------------------------------------------------------------------------------------|
| Anthropogenic emission inventory |              |                                                |                      |           |                                                                                            |                                                                                                                                                               |
| Non-China                        | EDGAR        | EDGAR v4.2 anthropogenic + biofuel             | 0.1°× 0.1°, monthly  | 2013-2014 | NO <sub>x</sub> , SO <sub>2</sub> , SO <sub>4</sub> <sup>2-</sup> , CO, NH <sub>3</sub>    | <a href="http://edgar.jrc.ec.europa.eu/overview.php?v=42">http://edgar.jrc.ec.europa.eu/overview.php?v=42</a>                                                 |
| Nested domain                    | BOND         | BOND biofuel + anthropogenic BC + OC emissions | 1°×1°, monthly       | 2000      | BC and OC                                                                                  | Bond et al. (2007)                                                                                                                                            |
| Non-China                        | RETRO        | RETRO anthropogenic + biofuel                  | 0.5°×0.5°, monthly   | 2000      | NMVOCs <sup>1</sup> except C <sub>2</sub> H <sub>6</sub> and C <sub>3</sub> H <sub>8</sub> | <a href="ftp://ftp.retro.enes.org/pub/emissions/agggregated/anthro/0.5x0.5/2000/">ftp://ftp.retro.enes.org/pub/emissions/agggregated/anthro/0.5x0.5/2000/</a> |
| Nested domain                    | SHIP         | ICODAS ship emissions                          | 1°×1°, monthly       | 2002      | NO <sub>x</sub> , SO <sub>2</sub> , CO                                                     | Wang et al. (2008)                                                                                                                                            |
| Nested domain                    | AEIC         | Aircraft emissions                             | 1°×1°, monthly       | 2005      | NO <sub>x</sub> , SO <sub>2</sub> , CO, NMVOCs <sup>1</sup> , BC, OC                       |                                                                                                                                                               |
| China                            | MEIC         | MEIC inventory for China                       | 0.25°×0.25°, monthly | 2013-2014 | NO <sub>x</sub> , SO <sub>2</sub> , CO, NMVOCs <sup>1</sup> , NH <sub>3</sub>              | <a href="http://www.meicmodel.org/">http://www.meicmodel.org/</a>                                                                                             |
| Central China                    | SEEA         | SEEA                                           | 0.1°× 0.1°, monthly  | 2017      | NO <sub>x</sub> , SO <sub>2</sub> , CO, NH <sub>3</sub> , VOCs                             |                                                                                                                                                               |



| Biomass burning emission inventory |                      |                                                           |                       |           |                                                                                                                                              |  |  |                                                     |  |
|------------------------------------|----------------------|-----------------------------------------------------------|-----------------------|-----------|----------------------------------------------------------------------------------------------------------------------------------------------|--|--|-----------------------------------------------------|--|
| Nested domain                      | GFED4                | GFED4 biomass burning inventory                           | 0.25°× 0.25°, monthly | 2013-2014 | NO <sub>x</sub> , SO <sub>2</sub> , CO, NMVOCs, NH <sub>3</sub> , BC, OC                                                                     |  |  | http://www.globalfiredata.org, Giglio et al. (2013) |  |
| Biogenic emission inventory        |                      |                                                           |                       |           |                                                                                                                                              |  |  |                                                     |  |
| Nested domain                      | MEGAN                | MEGAN v2.1 biogenic emissions                             | —                     | 2013-2014 | ISOP, monoterpenes, sesquiterpenes, MOH, ACET, ETOH, CH <sub>2</sub> O, ALD <sub>2</sub> , HCOOH, C <sub>2</sub> H <sub>4</sub> , TOLU, PRPE |  |  | Guenther et al. (2012)                              |  |
| Other natural emission inventory   |                      |                                                           |                       |           |                                                                                                                                              |  |  |                                                     |  |
| Nested domain                      | SoilNO <sub>x</sub>  | Emission of NO <sub>x</sub> from soils and fertiliser use | —                     | 2013-2014 | NO                                                                                                                                           |  |  | Hudman et al. (2012)                                |  |
| Nested domain                      | LightNO <sub>x</sub> | NO <sub>x</sub> from lightning                            | —                     | 2013-2014 | NO                                                                                                                                           |  |  | Murray et al. (2012)                                |  |

1. RETRO includes PRPE, ALK<sub>4</sub>, ALD<sub>2</sub>, CH<sub>2</sub>O and MEK; in the CTM, MEK emissions are further allocated to MEK (25 %) and ACET (75 %). AEIC and MEIC include PRPE, C<sub>2</sub>H<sub>6</sub>, C<sub>3</sub>H<sub>8</sub>, ALK<sub>4</sub>, ALD<sub>2</sub>, CH<sub>2</sub>O, MEK and ACET. NEI2011 includes PRPE, C<sub>3</sub>H<sub>8</sub>, ALK<sub>4</sub>, CH<sub>2</sub>O, MEK and ACET. EMEP includes PRPE, ALK<sub>4</sub>, ALD<sub>2</sub> and MEK. Emissions of C<sub>2</sub>H<sub>6</sub> outside Asia are from Xiao et al. (2008).



Table S3. The observed (modeled) meteorological conditions at Jingzhou averaged over these four pollution episodes controlled by SW-type, NW-type, A-type and C-type synoptic pattern, respectively.

| PSC | Temperature (°C) | Humidity (%)  | Pressure (kpa)    | Wind speed (m/s) |
|-----|------------------|---------------|-------------------|------------------|
| SW  | 11.79 (12.96)    | 75.33 (69.25) | 1018.33 (1024.06) | 2.13 (3.09)      |
| NW  | 3.61 (6.34)      | 71.16 (62.78) | 1027.53 (1031.53) | 1.44 (2.45)      |
| A   | 5.81 (7.52)      | 64.96 (60.38) | 1026.63 (1028.66) | 1.45 (2.27)      |
| C   | 9.60 (13.08)     | 78.10 (71.40) | 1011.48 (1014.24) | 1.88 (3.11)      |



Table S4. The emission amount of PM<sub>2.5</sub> precursors over Central China calculated from SEEA (for the year 2017) and MEIC (for the years of 2013, 2014 and 2017) inventory (unit: 10<sup>4</sup> ton).

| Category    | SO <sub>2</sub> | NO <sub>x</sub> | NH <sub>3</sub> | PM <sub>2.5</sub> | CO    | BC  | OC   | VOCs  |
|-------------|-----------------|-----------------|-----------------|-------------------|-------|-----|------|-------|
| SEEA (2017) | 48.4            | 94.0            | 54.6            | 26.4              | 553.8 | 6.2 | 12.9 | 117.2 |
| MEIC (2017) | 52.0            | 70.4            | 57.5            | 35.2              | 629.2 | 6.8 | 11.7 | 116.4 |
| MEIC (2013) | 173.3           | 98.4            | 62.4            | 54.5              | 836.5 | 9.2 | 16.7 | 116.6 |
| MEIC (2014) | 97.0            | 80.0            | 61.1            | 46.8              | 744.2 | 8.3 | 15.3 | 116.4 |



## Reference

- Auvray M., and Bey I: Long-range transport to Europe: seasonal variations and implications for the European ozone budget. *Journal of Geophysical Research: Atmospheres*, 110: D11303, 2005.
- Guenther, A. B., Jiang, X., Heald, C. L., Sakulyanontvittaya, T., Duhl, T., Emmons, L. K., and Wang, X.: The Model of Emissions of Gases and Aerosols from Nature version 2.1 (MEGAN2.1): an extended and updated framework for modeling biogenic emissions, *Geosci. Model Dev.*, 5, 1471–1492, <https://doi.org/10.5194/gmd-5-1471-2012>, 2012.
- Bond, T. C., Bhardwaj, E., Dong, R., Jogani, R., Jung, S., Roden, C., Streets, D. G., and Trautmann N. M.: Historical emissions of black and organic carbon aerosol from energy-related combustion, 1850-2000. *Global Biogeochem. Cycles*, 21: GB2018, 2007.
- Wang, Y., McElroy, M. B., Munger, J. W., Hao, J., Ma, H., Nielsen, C. P., and Chen, Y.: Variations of O<sub>3</sub> and CO in summertime at a rural site near Beijing, *Atmos. Chem. Phys.*, 8, 6355–6363, <https://doi.org/10.5194/acp-8-6355-2008>, 2008.
- Murray, L. T., Jacob D. J., Logan J. A., Hudman, R. C., and Koshak, W. J.: Optimized regional and interannual variability of lightning in a global chemical transport model constrained by LIS/OTD satellite data, *Journal of Geophysical Research: Atmospheres*, 117, 2012.
- Fu, X., Wang, S., Zhao, B., Xing, J., Cheng, Z., Liu, H., and Hao, J.: Emission inventory of primary pollutants and chemical speciation in 2010 for the Yangtze River Delta region, China, *Atmospheric Environment*, 70, 39-50, [10.1016/j.atmosenv.2012.12.034](https://doi.org/10.1016/j.atmosenv.2012.12.034), 2013.
- Hudman, R. C., Moore, N. E., Mebust, A. K., Martin, R. V., Russell, A. R., Valin, L. C., and Cohen, R. C.: Steps towards a mechanistic model of global soil nitric oxide emissions: implementation and space based-constraints, *Atmospheric Chemistry and Physics*, 12, 7779-7795, [10.5194/acp-12-7779-2012](https://doi.org/10.5194/acp-12-7779-2012), 2012.
- Pui, D. Y. H., Chen, S.C., and Zuo, Z.: PM<sub>2.5</sub> in China: Measurements, sources, visibility and health effects, and mitigation, *Particuology*, 13, 1-26, [10.1016/j.partic.2013.11.001](https://doi.org/10.1016/j.partic.2013.11.001), 2014.
- Yan, Q., Kong, S., Yan, Y., Liu, H., Wang, W., Chen, K., Yin, Y., Zheng, H., Wu, J., Yao, L., Zeng, X., Cheng, Y., Zheng, S., Wu, F., Niu, Z., Zhang, Y., Zheng, M., Zhao, D., Liu, D., and Qi, S.: Emission and simulation of primary fine and submicron particles and water-soluble ions from domestic coal combustion in China, *Atmospheric Environment*, 224, [10.1016/j.atmosenv.2020.117308](https://doi.org/10.1016/j.atmosenv.2020.117308), 2020.
- Yan, Y., Cabrera-Perez, D., Lin, J., Pozzer, A., Hu, L., Millet, D. B., Porter, W. C., and Lelieveld, J.: Global tropospheric effects of aromatic chemistry with the SAPRC-11 mechanism implemented in GEOS-Chem version 9-02, *Geoscientific Model Development*, 12, 111-130, [10.5194/gmd-12-111-2019](https://doi.org/10.5194/gmd-12-111-2019), 2019.
